# Supplementary figures and images for: Copper-catalyzed cascade cyclization reaction of 3-aminocyclobutenones with electron-deficient internal alkynes: synthesis of fully substituted indoles
Source: Royal Society of Chemistry journal article supplement (doi:10.1039/d0cc00512f), 2020-01-01

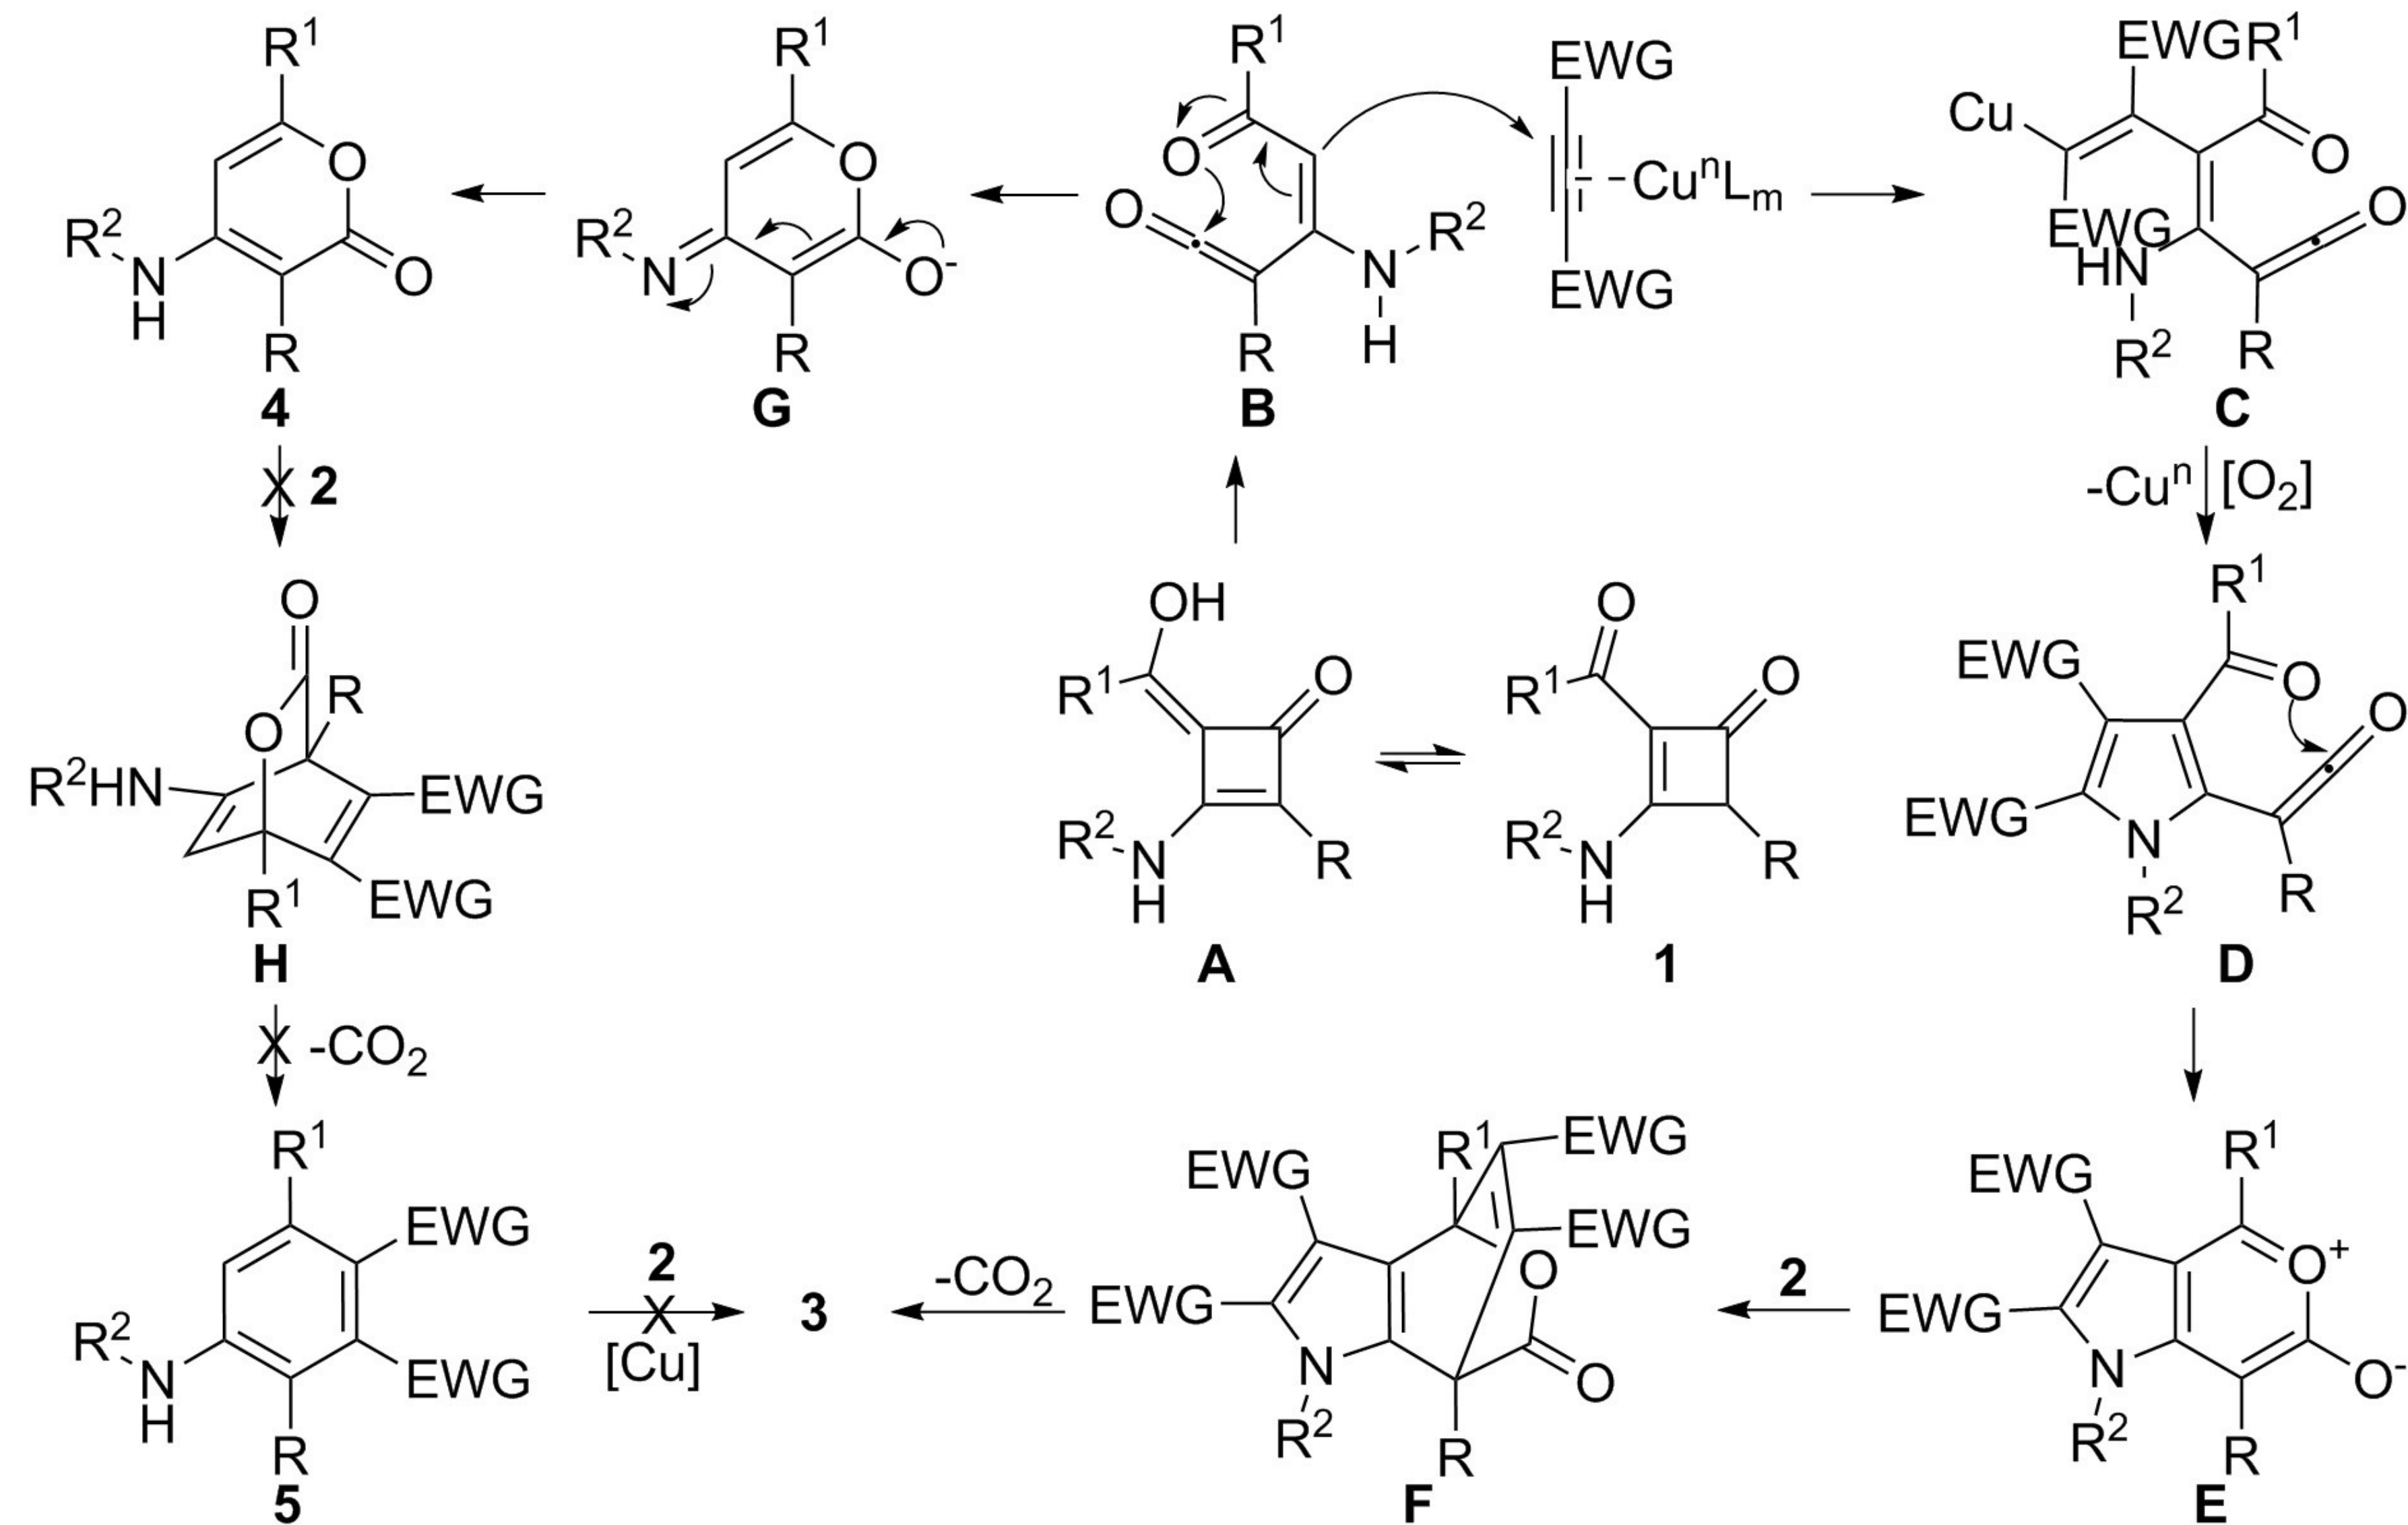

Supplement: d0cc00512f1.pdf [file d0cc00512f1.pdf]
